# Supplementary material for: Hospitalisations for emergency-sensitive conditions in Germany during the COVID-19 pandemic: insights from the German-wide Helios hospital network
Source: HighWire-hosted journal article supplement (doi:10.1136/emermed-2021-211183), 2021-09-20

## SUPPLEMENT

### **Hospitalizations for emergency-sensitive conditions in Germany**

#### **during the Covid-19 pandemic**

#### **Insights from the German-wide Helios hospital network**

Andreas Bollmann,<sup>1</sup> Sven Hohenstein,<sup>1</sup> Vincent Pellissier,<sup>1</sup>

Sebastian König,<sup>1</sup> Laura Ueberham,<sup>1</sup> Gerhard Hindricks,<sup>1</sup>

Andreas Meier-Hellmann,<sup>2</sup> Ralf Kuhlen<sup>3</sup>

on behalf of Helios hospitals, Germany

<sup>1</sup> Heart Center Leipzig at University of Leipzig and Leipzig Heart Institute, Leipzig Germany

<sup>2</sup> Helios Kliniken, Berlin, Germany

<sup>3</sup> Helios Health, Berlin, Germany

**Corresponding author:**

Andreas Bollmann, MD, PhD

Heart Center Leipzig at University of Leipzig

Strümpellstr. 39

04289 Leipzig

Germany

Phone: ++49 341 865 1410

Fax: ++49 341 865 1460

Email: [andreas.bollmann@helios-gesundheit.de](mailto:andreas.bollmann@helios-gesundheit.de)

## **Index**

### **German Diagnosis Related Groups**

**Table S1.** Emergency hospital admissions in the German-wide Helios hospital network during the Covid-19 pandemic.

**Table S2.** Hospitalizations in emergent bed-based, emergent bed-based for emergency-sensitive conditions and ambulatory care between 2016 and 2020.

**Table S3.** In-hospital mortality for emergency-sensitive conditions.

**Figure S1.** Hospitalizations per hospital in 2019 and 2020.

### **German Diagnosis Related Groups**

The German Diagnosis Related Groups (G-DRG) system is used for hospital reimbursement in Germany since 2004 and is subject to encoded diagnoses (International Statistical Classification of Diseases, German Modification; ICD-10 GM) and procedures (German procedure classification; OPS). This obligatory documentation and accounting system is specified and regulated in detail by mandatory coding instructions and requires the coding of a main diagnosis for all in-hospital cases reflecting the underlying cause for hospital admission. Up to 15% of the codes are controlled – and corrected if required – by specialized physicians (“Medizinischer Dienst der Krankenversicherung”) independently from health insurances and hospitals. Administrative data for this study were extracted from QlikView (QlikTech, Radnor, Pennsylvania, USA).

**Table S1.** Emergency hospital admissions in the German-wide Helios hospital network during the Covid-19 pandemic. ICD-10 codes for the emergency-sensitive conditions are provided in parenthesis.<sup>7</sup>

|                                                                          |          | Deficit period   |                     |                | Resumption period |                  |                     |                |
|--------------------------------------------------------------------------|----------|------------------|---------------------|----------------|-------------------|------------------|---------------------|----------------|
|                                                                          | <i>n</i> | Daily admissions | IRR (95% CI)        | <i>P</i> value | <i>n</i>          | Daily admissions | IRR (95% CI)        | <i>P</i> value |
| <b>Diabetes mellitus type 2 (E11)</b>                                    |          |                  |                     |                |                   |                  |                     |                |
| 2019                                                                     | 1,291    | 13.7             |                     |                | 2,147             | 13.7             |                     |                |
| 2020                                                                     | 1,102    | 11.7             | 0.85<br>(0.79–0.92) | < 0.01         | 2,057             | 13.1             | 0.96<br>(0.90–1.02) | 0.16           |
| <b>Other disorders of fluid, electrolyte and acid-base balance (E87)</b> |          |                  |                     |                |                   |                  |                     |                |
| 2019                                                                     | 412      | 4.4              |                     |                | 920               | 5.9              |                     |                |
| 2020                                                                     | 357      | 3.8              | 0.87<br>(0.75–1.00) | 0.04           | 919               | 5.8              | 1.00<br>(0.91–1.09) | 0.98           |
| <b>Other disorders of brain (G93)</b>                                    |          |                  |                     |                |                   |                  |                     |                |
| 2019                                                                     | 59       | 0.6              |                     |                | 121               | 0.8              |                     |                |
| 2020                                                                     | 49       | 0.5              | 0.83<br>(0.57–1.21) | 0.34           | 122               | 0.8              | 1.01<br>(0.78–1.30) | 0.95           |
| <b>Pulmonary embolism (I26)</b>                                          |          |                  |                     |                |                   |                  |                     |                |
| 2019                                                                     | 660      | 7.0              |                     |                | 1,215             | 7.7              |                     |                |
| 2020                                                                     | 660      | 7.0              | 1.00<br>(0.90–1.11) | 1.00           | 1,386             | 8.8              | 1.14<br>(1.06–1.23) | < 0.01         |
| <b>Cardiac arrest (I46)</b>                                              |          |                  |                     |                |                   |                  |                     |                |
| 2019                                                                     | 143      | 1.5              |                     |                | 238               | 1.5              |                     |                |
| 2020                                                                     | 138      | 1.5              | 0.97<br>(0.76–1.22) | 0.77           | 233               | 1.5              | 0.98<br>(0.82–1.17) | 0.81           |
| <b>Heart failure (I50)</b>                                               |          |                  |                     |                |                   |                  |                     |                |
| 2019                                                                     | 6,152    | 65.4             |                     |                | 9,054             | 57.7             |                     |                |
| 2020                                                                     | 5,187    | 55.2             | 0.84<br>(0.81–0.87) | < 0.01         | 9,101             | 58.0             | 1.01<br>(0.98–1.03) | 0.73           |
| <b>Subarachnoid haemorrhage (I60)</b>                                    |          |                  |                     |                |                   |                  |                     |                |

|                                                                |       |      |                     |        |       |      |                     |      |
|----------------------------------------------------------------|-------|------|---------------------|--------|-------|------|---------------------|------|
| 2019                                                           | 67    | 0.7  |                     |        | 110   | 0.7  |                     |      |
| 2020                                                           | 62    | 0.7  | 0.93<br>(0.66–1.31) | 0.66   | 112   | 0.7  | 1.02<br>(0.78–1.32) | 0.89 |
| <b>Intracerebral haemorrhage (I61)</b>                         |       |      |                     |        |       |      |                     |      |
| 2019                                                           | 320   | 3.4  |                     |        | 546   | 3.5  |                     |      |
| 2020                                                           | 331   | 3.5  | 1.03<br>(0.89–1.21) | 0.67   | 498   | 3.2  | 0.91<br>(0.81–1.03) | 0.13 |
| <b>Other non traumatic intracranial haemorrhage (I62)</b>      |       |      |                     |        |       |      |                     |      |
| 2019                                                           | 57    | 0.6  |                     |        | 102   | 0.6  |                     |      |
| 2020                                                           | 43    | 0.5  | 0.75<br>(0.51–1.12) | 0.16   | 102   | 0.6  | 1.00<br>(0.76–1.32) | 1.00 |
| <b>Cerebral infarction (I63) and unspecified stroke (I64)*</b> |       |      |                     |        |       |      |                     |      |
| 2019                                                           | 3,018 | 32.1 |                     |        | 4,960 | 31.6 |                     |      |
| 2020                                                           | 2,824 | 30.0 | 0.94<br>(0.89–0.98) | 0.01   | 5,035 | 32.1 | 1.02<br>(0.98–1.06) | 0.45 |
| <b>Aortic aneurism and dissection (I71)</b>                    |       |      |                     |        |       |      |                     |      |
| 2019                                                           | 131   | 1.4  |                     |        | 224   | 1.4  |                     |      |
| 2020                                                           | 138   | 1.5  | 1.05<br>(0.83–1.34) | 0.67   | 271   | 1.7  | 1.21<br>(1.02–1.44) | 0.03 |
| <b>Adult respiratory distress syndrome (J80)</b>               |       |      |                     |        |       |      |                     |      |
| 2019                                                           | 11    | 0.1  |                     |        | 16    | 0.1  |                     |      |
| 2020                                                           | 34    | 0.4  | 3.09<br>(1.57–6.09) | < 0.01 | 25    | 0.2  | 1.56<br>(0.84–2.92) | 0.16 |
| <b>Respiratory failure, not elsewhere classified (J96)</b>     |       |      |                     |        |       |      |                     |      |
| 2019                                                           | 184   | 2.0  |                     |        | 277   | 1.8  |                     |      |
| 2020                                                           | 131   | 1.4  | 0.71<br>(0.57–0.88) | < 0.01 | 305   | 1.9  | 1.10<br>(0.94–1.29) | 0.23 |
| <b>Duodenal ulcer (K26)</b>                                    |       |      |                     |        |       |      |                     |      |
| 2019                                                           | 329   | 3.5  |                     |        | 577   | 3.7  |                     |      |
| 2020                                                           | 306   | 3.3  | 0.93<br>(0.80–1.08) | 0.35   | 598   | 3.8  | 1.04<br>(0.93–1.16) | 0.53 |

| <b>Vascular disorders of intestine (K55)</b>     |       |      |                     |        |       |      |                     |      |
|--------------------------------------------------|-------|------|---------------------|--------|-------|------|---------------------|------|
| 2019                                             | 288   | 3.1  |                     |        | 440   | 2.8  |                     |      |
| 2020                                             | 287   | 3.0  | 1.00<br>(0.85–1.17) | 0.97   | 471   | 3.0  | 1.07<br>(0.94–1.22) | 0.30 |
| <b>Diverticular disease of intestine (K57)</b>   |       |      |                     |        |       |      |                     |      |
| 2019                                             | 1,225 | 13.0 |                     |        | 2,190 | 14.0 |                     |      |
| 2020                                             | 1,101 | 11.7 | 0.90<br>(0.83–0.97) | < 0.01 | 2,166 | 13.8 | 0.99<br>(0.93–1.05) | 0.71 |
| <b>Peritonitis (K65)</b>                         |       |      |                     |        |       |      |                     |      |
| 2019                                             | 122   | 1.3  |                     |        | 220   | 1.4  |                     |      |
| 2020                                             | 122   | 1.3  | 1.00<br>(0.78–1.29) | 1.00   | 233   | 1.5  | 1.06<br>(0.89–1.27) | 0.53 |
| <b>Hepatic failure (K72)</b>                     |       |      |                     |        |       |      |                     |      |
| 2019                                             | 75    | 0.8  |                     |        | 103   | 0.7  |                     |      |
| 2020                                             | 50    | 0.5  | 0.67<br>(0.47–0.95) | 0.03   | 95    | 0.6  | 0.92<br>(0.70–1.22) | 0.57 |
| <b>Acute pancreatitis (K85)</b>                  |       |      |                     |        |       |      |                     |      |
| 2019                                             | 745   | 7.9  |                     |        | 1,221 | 7.8  |                     |      |
| 2020                                             | 651   | 6.9  | 0.87<br>(0.79–0.97) | 0.01   | 1,195 | 7.6  | 0.98<br>(0.90–1.06) | 0.59 |
| <b>Other diseases of digestive system (K92)</b>  |       |      |                     |        |       |      |                     |      |
| 2019                                             | 548   | 5.8  |                     |        | 916   | 5.8  |                     |      |
| 2020                                             | 467   | 5.0  | 0.85<br>(0.75–0.96) | < 0.01 | 865   | 5.5  | 0.94<br>(0.86–1.04) | 0.22 |
| <b>Shock, not elsewhere classified (R57)</b>     |       |      |                     |        |       |      |                     |      |
| 2019                                             | 54    | 0.6  |                     |        | 101   | 0.6  |                     |      |
| 2020                                             | 61    | 0.7  | 1.13<br>(0.78–1.63) | 0.51   | 122   | 0.8  | 1.21<br>(0.93–1.57) | 0.16 |
| <b>Fracture of lumbar spine and pelvis (S32)</b> |       |      |                     |        |       |      |                     |      |
| 2019                                             | 1,065 | 11.3 |                     |        | 1,796 | 11.4 |                     |      |

|                                                                                            |       |      |                     |      |       |      |                     |        |
|--------------------------------------------------------------------------------------------|-------|------|---------------------|------|-------|------|---------------------|--------|
| 2020                                                                                       | 1,013 | 10.8 | 0.95<br>(0.87–1.04) | 0.25 | 1,711 | 10.9 | 0.95<br>(0.89–1.02) | 0.15   |
| <b>Fracture of femur (S72)</b>                                                             |       |      |                     |      |       |      |                     |        |
| 2019                                                                                       | 2,322 | 24.7 |                     |      | 3,787 | 24.1 |                     |        |
| 2020                                                                                       | 2,398 | 25.5 | 1.03<br>(0.98–1.09) | 0.27 | 4,097 | 26.1 | 1.08<br>(1.04–1.13) | < 0.01 |
| <b>Complications of cardiac and vascular prosthetic devices, implants and grafts (T82)</b> |       |      |                     |      |       |      |                     |        |
| 2019                                                                                       | 382   | 4.1  |                     |      | 677   | 4.3  |                     |        |
| 2020                                                                                       | 357   | 3.8  | 0.93<br>(0.81–1.08) | 0.35 | 658   | 4.2  | 0.97<br>(0.87–1.08) | 0.60   |

**Table S2.** Hospitalizations in emergent bed-based, emergent bed-based for emergency-sensitive conditions and ambulatory care between 2016 and 2020. Please note, that the reduction is also apparent when comparing IRR of 2020 with previous years.

| Year                                                   | n       | Daily admissions | IRR<br>(95% CI)  | P value |
|--------------------------------------------------------|---------|------------------|------------------|---------|
| <b>Inpatient cases</b>                                 |         |                  |                  |         |
| 2016                                                   | 462,204 | 1435.4           | 0.95 (0.95–0.96) | < 0.01  |
| 2017                                                   | 476,534 | 1479.9           | 0.98 (0.98–0.99) | < 0.01  |
| 2018                                                   | 479,388 | 1488.8           | 0.99 (0.99–0.99) | < 0.01  |
| 2019                                                   | 484,368 | 1504.2           | Reference        |         |
| 2020                                                   | 453,082 | 1407.1           | 0.94 (0.93–0.94) | < 0.01  |
| 2020*                                                  | 435,793 | 1353.4           | 0.90 (0.90–0.90) | < 0.01  |
| <b>Inpatient cases, emergency-sensitive conditions</b> |         |                  |                  |         |
| 2016                                                   | 123,449 | 383.4            | 0.92 (0.91–0.93) | < 0.01  |
| 2017                                                   | 130,573 | 405.5            | 0.97 (0.96–0.98) | < 0.01  |
| 2018                                                   | 133,942 | 416.0            | 1.00 (0.99–1.00) | < 0.37  |
| 2019                                                   | 134,409 | 417.4            | Reference        |         |
| 2020                                                   | 124,559 | 386.8            | 0.93 (0.92–0.93) | < 0.01  |
| 2020*                                                  | 119,802 | 372.1            | 0.89 (0.88–0.90) | < 0.01  |
| <b>Outpatient cases</b>                                |         |                  |                  |         |
| 2016                                                   | 35,896  | 111.5            | 1.15 (1.13–1.16) | < 0.01  |
| 2017                                                   | 31,757  | 98.6             | 1.01 (1.00–1.03) | 0.07    |
| 2018                                                   | 29,892  | 92.8             | 0.95 (0.94–0.97) | < 0.01  |
| 2019                                                   | 31,306  | 97.2             | Reference        |         |
| 2020                                                   | 17,813  | 55.3             | 0.57 (0.56–0.58) | < 0.01  |
| 2020*                                                  | 17,356  | 53.9             | 0.55 (0.54–0.56) | < 0.01  |

\* Exclusion of hospitals with inconsistent data availability.



**Table S3.** In-hospital mortality for emergency-sensitive conditions.

|                                                                                |                | Deficit period      |         |                | Resumption period   |         |  |
|--------------------------------------------------------------------------------|----------------|---------------------|---------|----------------|---------------------|---------|--|
| Year                                                                           | Proportion (n) | Odds ratio (95% CI) | P value | Proportion (n) | Odds ratio (95% CI) | P value |  |
| <b>Diabetes Mellitus type 2</b>                                                |                |                     |         |                |                     |         |  |
| 2019                                                                           | 2.9% (36)      |                     |         | 2.4% (50)      |                     |         |  |
| 2020                                                                           | 3.9% (41)      | 1.33 (0.85– 2.11)   | 0.21    | 2.6% (52)      | 1.08 (0.73– 1.60)   | 0.70    |  |
| <b>Volume depletion</b>                                                        |                |                     |         |                |                     |         |  |
| 2019                                                                           | 4.3% (67)      |                     |         | 3.6% (111)     |                     |         |  |
| 2020                                                                           | 5.1% (62)      | 1.21 (0.85– 1.73)   | 0.29    | 3.0% (85)      | 0.82 (0.61– 1.09)   | 0.16    |  |
| <b>Delirium, not induced by alcohol and other psychoactive substances</b>      |                |                     |         |                |                     |         |  |
| 2019                                                                           | 4.8% (16)      |                     |         | 4.0% (23)      |                     |         |  |
| 2020                                                                           | 5.0% (12)      | 1.04 (0.47– 2.23)   | 0.92    | 4.0% (19)      | 0.98 (0.52– 1.83)   | 0.96    |  |
| <b>Other disorders of brain</b>                                                |                |                     |         |                |                     |         |  |
| 2019                                                                           | 18.2% (10)     |                     |         | 8.8% (10)      |                     |         |  |
| 2020                                                                           | 6.7% (3)       | 0.32 (0.07– 1.13)   | 0.10    | 16.1% (18)     | 1.99 (0.89– 4.69)   | 0.10    |  |
| <b>Acute Myocardial Infarction (AMI) or Other acute ischemic heart disease</b> |                |                     |         |                |                     |         |  |
| 2019                                                                           | 6.4% (158)     |                     |         | 5.5% (216)     |                     |         |  |
| 2020                                                                           | 7.1% (165)     | 1.10 (0.88– 1.38)   | 0.40    | 6.2% (261)     | 1.13 (0.94– 1.36)   | 0.19    |  |
| <b>Pulmonary embolism</b>                                                      |                |                     |         |                |                     |         |  |
| 2019                                                                           | 10.5% (67)     |                     |         | 10.8% (126)    |                     |         |  |
| 2020                                                                           | 8.7% (55)      | 0.81 (0.55– 1.17)   | 0.27    | 8.8% (117)     | 0.80 (0.61– 1.04)   | 0.10    |  |
| <b>Cardiac arrest</b>                                                          |                |                     |         |                |                     |         |  |
| 2019                                                                           | 96.3% (129)    |                     |         | 94.4% (219)    |                     |         |  |
| 2020                                                                           | 92.7% (127)    | 0.49 (0.15– 1.43)   | 0.21    | 91.2% (206)    | 0.61 (0.29– 1.25)   | 0.18    |  |
| <b>Subarachnoid haemorrhage</b>                                                |                |                     |         |                |                     |         |  |
| 2019                                                                           | 28.8% (15)     |                     |         | 23.3% (20)     |                     |         |  |

|                                                                                  |             |                   |      |             |                   |      |
|----------------------------------------------------------------------------------|-------------|-------------------|------|-------------|-------------------|------|
| 2020                                                                             | 28.6% (14)  | 0.99 (0.41– 2.35) | 0.98 | 31.5% (29)  | 1.52 (0.78– 2.99) | 0.22 |
| <b>Intracerebral haemorrhage</b>                                                 |             |                   |      |             |                   |      |
| 2019                                                                             | 37.4% (102) |                   |      | 38.5% (174) |                   |      |
| 2020                                                                             | 37.8% (104) | 1.02 (0.72– 1.44) | 0.91 | 39.2% (162) | 1.03 (0.78– 1.36) | 0.83 |
| <b>Other non traumatic intracranial haemorrhage</b>                              |             |                   |      |             |                   |      |
| 2019                                                                             | 8.7% (4)    |                   |      | 9.4% (8)    |                   |      |
| 2020                                                                             | 22.2% (8)   | 3.00 (0.86–12.13) | 0.10 | 16.5% (15)  | 1.90 (0.78– 4.96) | 0.17 |
| <b>Cerebral infarction or Stroke, not specified as haemorrhage or infarction</b> |             |                   |      |             |                   |      |
| 2019                                                                             | 6.1% (168)  |                   |      | 6.3% (283)  |                   |      |
| 2020                                                                             | 6.9% (178)  | 1.13 (0.91– 1.41) | 0.26 | 5.6% (254)  | 0.88 (0.74– 1.04) | 0.14 |
| <b>Aortic aneurism and dissection</b>                                            |             |                   |      |             |                   |      |
| 2019                                                                             | 26.7% (31)  |                   |      | 24.0% (44)  |                   |      |
| 2020                                                                             | 23.9% (27)  | 0.86 (0.47– 1.56) | 0.62 | 26.6% (61)  | 1.15 (0.73– 1.80) | 0.55 |
| <b>Pneumonitis due to solids and liquids</b>                                     |             |                   |      |             |                   |      |
| 2019                                                                             | 29.2% (115) |                   |      | 29.6% (187) |                   |      |
| 2020                                                                             | 32.3% (109) | 1.16 (0.85– 1.59) | 0.36 | 26.4% (187) | 0.85 (0.67– 1.08) | 0.20 |
| <b>Adult respiratory distress syndrome</b>                                       |             |                   |      |             |                   |      |
| 2019                                                                             | 57.1% (4)   |                   |      | 87.5% (7)   |                   |      |
| 2020                                                                             | 76.0% (19)  | 2.37 (0.38–14.13) | 0.33 | 82.4% (14)  | 0.67 (0.03– 6.38) | 0.74 |
| <b>Duodenal ulcer</b>                                                            |             |                   |      |             |                   |      |
| 2019                                                                             | 7.3% (23)   |                   |      | 6.6% (37)   |                   |      |
| 2020                                                                             | 6.3% (18)   | 0.86 (0.45– 1.62) | 0.63 | 7.4% (43)   | 1.13 (0.71– 1.78) | 0.61 |
| <b>Paralytic ileus and intestinal obstruction without hernia</b>                 |             |                   |      |             |                   |      |
| 2019                                                                             | 5.6% (63)   |                   |      | 5.6% (103)  |                   |      |
| 2020                                                                             | 5.1% (52)   | 0.92 (0.63– 1.34) | 0.67 | 5.0% (99)   | 0.89 (0.67– 1.18) | 0.42 |

| <b>Diverticular disease of intestine</b>   |             |                   |      |             |                   |      |
|--------------------------------------------|-------------|-------------------|------|-------------|-------------------|------|
| 2019                                       | 1.7% (20)   |                   |      | 1.2% (26)   |                   |      |
| 2020                                       | 1.6% (17)   | 0.95 (0.49– 1.82) | 0.87 | 1.3% (28)   | 1.09 (0.64– 1.88) | 0.75 |
| <b>Peritonitis</b>                         |             |                   |      |             |                   |      |
| 2019                                       | 14.5% (16)  |                   |      | 9.6% (20)   |                   |      |
| 2020                                       | 13.3% (15)  | 0.90 (0.42– 1.93) | 0.78 | 8.3% (18)   | 0.86 (0.44– 1.68) | 0.66 |
| <b>Hepatic failure</b>                     |             |                   |      |             |                   |      |
| 2019                                       | 35.9% (23)  |                   |      | 42.2% (38)  |                   |      |
| 2020                                       | 26.8% (11)  | 0.65 (0.27– 1.52) | 0.33 | 46.2% (37)  | 1.18 (0.64– 2.16) | 0.60 |
| <b>Acute pancreatitis</b>                  |             |                   |      |             |                   |      |
| 2019                                       | 2.1% (15)   |                   |      | 1.6% (19)   |                   |      |
| 2020                                       | 2.2% (14)   | 1.06 (0.50– 2.23) | 0.87 | 1.5% (17)   | 0.91 (0.47– 1.77) | 0.79 |
| <b>Cellulitis</b>                          |             |                   |      |             |                   |      |
| 2019                                       | 1.2% (8)    |                   |      | 1.3% (16)   |                   |      |
| 2020                                       | 1.4% (7)    | 1.13 (0.39– 3.16) | 0.82 | 0.6% (7)    | 0.48 (0.18– 1.13) | 0.11 |
| <b>Acute renal failure</b>                 |             |                   |      |             |                   |      |
| 2019                                       | 15.5% (173) |                   |      | 13.4% (236) |                   |      |
| 2020                                       | 17.1% (148) | 1.12 (0.88– 1.42) | 0.36 | 14.4% (235) | 1.09 (0.90– 1.32) | 0.39 |
| <b>Shock, not elsewhere classified</b>     |             |                   |      |             |                   |      |
| 2019                                       | 55.1% (27)  |                   |      | 58.8% (57)  |                   |      |
| 2020                                       | 69.5% (41)  | 1.86 (0.85– 4.13) | 0.12 | 69.0% (80)  | 1.56 (0.89– 2.75) | 0.12 |
| <b>Intracranial injury</b>                 |             |                   |      |             |                   |      |
| 2019                                       | 2.5% (82)   |                   |      | 2.1% (124)  |                   |      |
| 2020                                       | 2.7% (72)   | 1.11 (0.80– 1.53) | 0.52 | 2.6% (125)  | 1.21 (0.94– 1.55) | 0.14 |
| <b>Fracture of lumbar spine and pelvis</b> |             |                   |      |             |                   |      |

|                                                                                      |            |                   |      |            |                   |      |
|--------------------------------------------------------------------------------------|------------|-------------------|------|------------|-------------------|------|
| 2019                                                                                 | 1.7% (17)  |                   |      | 2.5% (41)  |                   |      |
| 2020                                                                                 | 2.5% (23)  | 1.43 (0.76– 2.73) | 0.27 | 2.8% (43)  | 1.12 (0.73– 1.74) | 0.60 |
| <b>Fracture of femur</b>                                                             |            |                   |      |            |                   |      |
| 2019                                                                                 | 4.8% (96)  |                   |      | 5.9% (195) |                   |      |
| 2020                                                                                 | 4.9% (103) | 1.03 (0.77– 1.37) | 0.84 | 5.1% (178) | 0.85 (0.69– 1.05) | 0.14 |
| <b>Complications of cardiac and vascular prosthetic devices, implants and grafts</b> |            |                   |      |            |                   |      |
| 2019                                                                                 | 1.9% (7)   |                   |      | 2.5% (16)  |                   |      |
| 2020                                                                                 | 1.8% (6)   | 0.91 (0.29– 2.77) | 0.87 | 1.6% (10)  | 0.64 (0.28– 1.40) | 0.27 |

Based on 183,803 cases (93.8%). We excluded cases with discharge due to hospital transfer or unspecified reason. Proportion of excluded cases was stable ranging between 5.9 and 6.5% per year and period.

**Figure S1.** Hospitalizations per hospital in 2019 (red) and 2020 (green). Case numbers are displayed per hospital with 2019 bars below 2020 bars for every hospital.

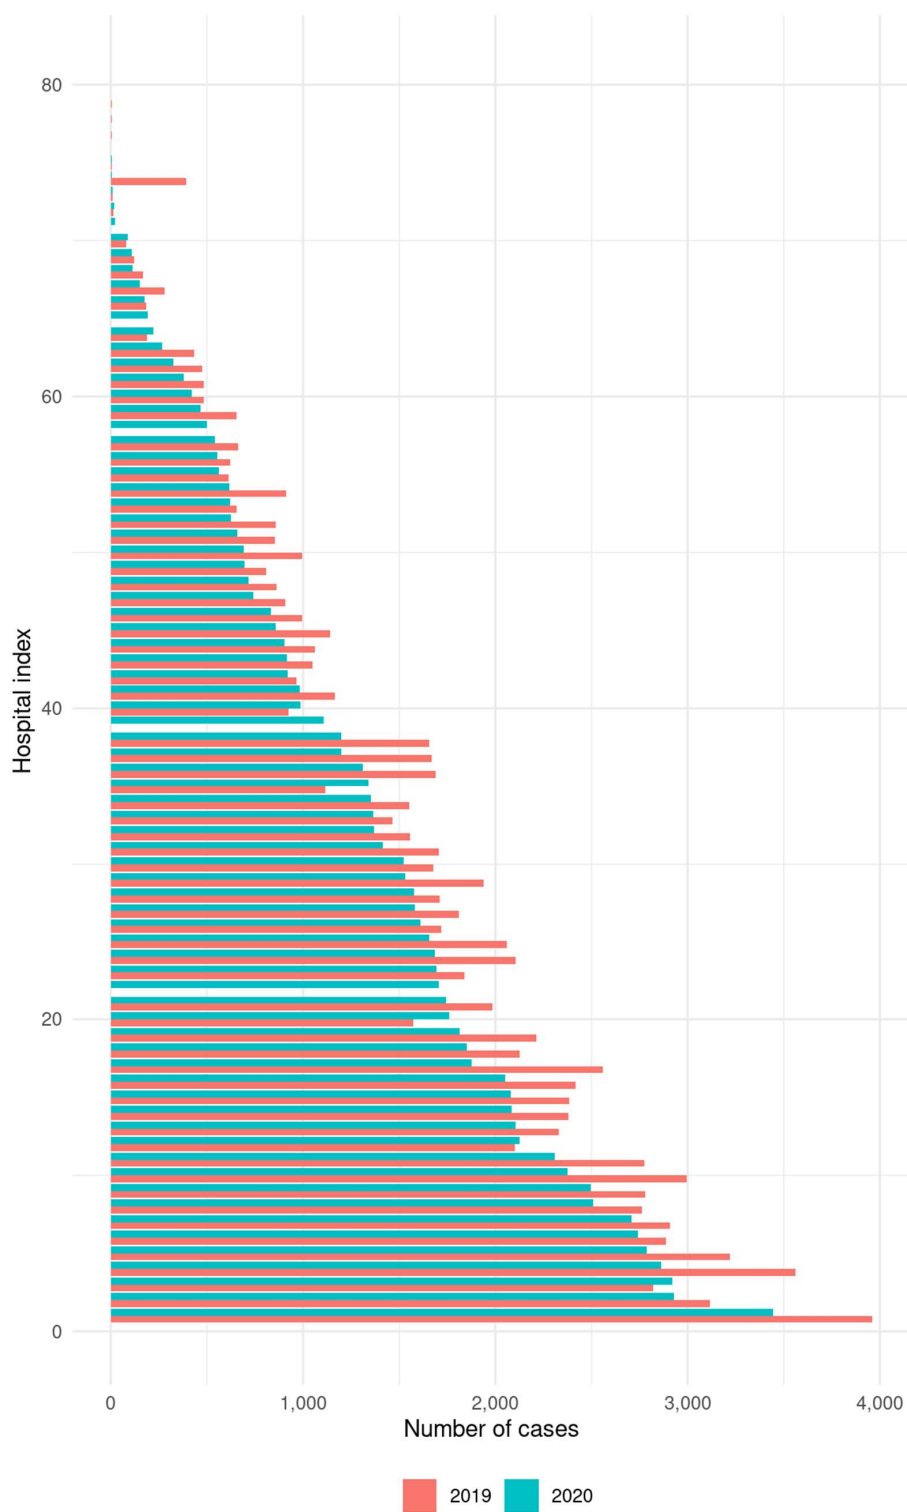

Supplement: emermed-2021-211183supp001_data_supplement.pdf [file emermed-2021-211183supp001_data_supplement.pdf]
